# 1 **Rapid and precise genome engineering in a naturally short-lived vertebrate**

2 Ravi D. Nath<sup>1,6</sup>, Claire N. Bedbrook<sup>1,2,6</sup>, Rahul Nagvekar<sup>1</sup>, Karl Deisseroth<sup>2,3,4</sup>, Anne Brunet<sup>1,5,\*</sup>

3  
4 <sup>1</sup>Department of Genetics, Stanford University, Stanford, CA 94305, USA

5 <sup>2</sup>Department of Bioengineering, Stanford University, Stanford, CA 94305, USA

6 <sup>3</sup>Department of Psychiatry and Behavioral Sciences, Stanford University, Stanford, CA 94305, USA

7 <sup>4</sup>Howard Hughes Medical Institute, Stanford University, Stanford, CA 94305, USA

8 <sup>5</sup>Glenn Laboratories for the Biology of Aging at Stanford, Stanford, CA 94305, USA

9 <sup>6</sup>These authors contributed equally

10 \*Correspondence: [abrunet1@stanford.edu](mailto:abrunet1@stanford.edu)

11

## 12 **Abstract**

13 The African turquoise killifish is a powerful vertebrate system to study complex phenotypes at scale,  
14 including aging and age-related disease. Here we develop a rapid and precise CRISPR/Cas9-mediated  
15 knock-in approach in the killifish. We show its efficient application to precisely insert fluorescent reporters  
16 of different sizes at various genomic loci, to drive cell-type- and tissue-specific expression. This knock-in  
17 method should allow the establishment of humanized disease models and the development of cell-type-  
18 specific molecular probes for studying complex vertebrate biology.

19

## 20 **Abbreviations**

21 CN, cortical nucleus; CP, central posterior thalamic nucleus; Cpost, posterior commissure; DIL, diffuse  
22 inferior lobe of hypothalamus; gl, glomerular layer; Ha, habenular nucleus; Hc, caudal hypothalamus; Hd,  
23 dorsal hypothalamus; Hv, ventral hypothalamus; llf, lateral longitudinal fascicle; LR, lateral recess of  
24 diencephalic ventricle; mlf, medial longitudinal fascicle; MO, medulla oblongata; NG, glomerular nucleus;  
25 OB, olfactory bulb; ON, optic nerve; OT, optic tectum; PGZ, periglomerular gray zone; Tel, telencephalon;  
26 TI, torus longitudinalis; TNa, anterior tuberal nucleus; TPp, periventricular nucleus of posterior  
27 tuberculum; Va, valvula of cerebellum; VAO, ventral accessory optic nucleus

28

## 29 **Main text**

30 Studying complex biological phenotypes such as aging and disease in vertebrates is limited by  
31 issues of scale and speed. For example, the inherent long lifespan and low-throughput nature of mice  
32 prohibit iterative genetics and exploration of vertebrate biology. The African turquoise killifish  
33 *Nothobranchius furzeri* (hereafter killifish) has emerged as a powerful model to overcome this challenge  
34 and accelerate discovery due to its rapid timeline for sexual maturity (3–4 weeks post hatching) and  
35 naturally compressed lifespan (4–6 months) (Hu and Brunet, 2018; Kim et al., 2016). The killifish has the

36 shortest generation time of a vertebrate model system bred in the laboratory (2 months) (Hu and Brunet,  
37 2018; Kim et al., 2016; Polacik et al., 2016), making rapid vertebrate genetics possible. Tools to advance  
38 genetic interrogation of the killifish have been developed, including a sequenced genome (Reichwald et  
39 al., 2015; Valenzano et al., 2015) and Tol2 transgenesis (Allard et al., 2013; Hartmann and Englert, 2012;  
40 Valenzano et al., 2011), as well as CRISPR/Cas9-mediated knock-out (Harel et al., 2015) and  
41 CRISPR/Cas13-mediated knock-down (Kushawah et al., 2020). This genetic toolkit has enabled  
42 discoveries about the mechanisms of aging (Astre et al., 2022a; Bradshaw et al., 2022; Chen et al., 2022;  
43 Harel et al., 2022; Louka et al., 2022; Matsui et al., 2019; Smith et al., 2017; Van Houcke et al., 2021b),  
44 regeneration (Vanhunsel et al., 2022a; Vanhunsel et al., 2021; Vanhunsel et al., 2022b; Wang et al.,  
45 2020), evolution (Cui et al., 2019; Sahm et al., 2017; Singh et al., 2021; Willemsen et al., 2020),  
46 development (Abitua et al., 2021; Dolfi et al., 2019), and ‘suspended animation’ (Hu et al., 2020; Singh  
47 et al., 2021).

48  
49 Knock-in methods are essential for genetic tractability of model organisms. They enable precise  
50 mutations in key genes for mechanistic studies and human disease modeling. Knock-in technologies also  
51 allow the insertion of molecular tags or reporters at specific genomic loci. Combined with self-cleaving  
52 peptides, a knock-in approach can be leveraged to drive cell-type- and tissue-specific expression of  
53 ectopic genes (e.g., genes of interest, recombinases) or probes (e.g., fluorescent reporters, calcium  
54 indicators). While small insertions (<8 bp) have been achieved via knock-in in the killifish genome in the  
55 parental generation (Harel et al., 2015), a method to precisely insert large transgenes and allow the  
56 efficient generation of stable lines with germline transmission is missing.

57  
58 **CRISPR/Cas9-mediated knock-in in killifish allows efficient tissue-specific expression of**  
59 **fluorescent reporters**

60 To achieve precise integration of genes of interest at endogenous target loci, we developed a  
61 method based on CRISPR/Cas9-mediated homology-directed repair (HDR). CRISPR/Cas9-mediated  
62 HDR is often associated with issues of low efficiency and multicopy insertion (Auer et al., 2014). To  
63 overcome these issues, we injected killifish embryos with a cocktail (see Methods) composed of (1)  
64 recombinant Cas9 protein, (2) chemically-modified guide RNAs (gRNAs), (3) a chemically-modified linear  
65 double-stranded DNA (dsDNA) HDR template, and (4) an HDR chemical enhancer which inhibits non-  
66 homologous end joining (NHEJ) (DiNapoli et al., 2020; Gutierrez-Triana et al., 2018; Seleit et al., 2021;  
67 Wierson et al., 2020). We designed the dsDNA HDR template with 150–200 bp homology arms flanking  
68 the site of insertion at the target locus (in this case the stop codon of a specific gene) (Figure 1A). To  
69 rapidly assess the efficiency of CRISPR/Cas9-mediated knock-in, we included the following sequences  
70 in the dsDNA HDR template: a T2A sequence (encoding the T2A self-cleaving peptide (Szymczak et al.,  
71 2004)) and the fluorescent protein Venus (Nagai et al., 2002). Use of the T2A self-cleaving peptide avoids

72 direct fusion of the fluorescent protein to the targeted gene's protein product (Figure 1A; Supplemental  
73 Table 1). The modified dsDNA HDR template and gRNAs can all be directly ordered (see Methods),  
74 which alleviates the need for cloning or PCR. With successful insertion, the expression of Venus should  
75 be controlled by the endogenous regulatory elements (e.g., promoter, enhancers) of the target gene,  
76 which could be leveraged for cell-type- or tissue-specific expression.

77  
78 Using this approach, we targeted Venus to three distinct genomic loci in the killifish: *ELAVL3*,  
79 *CRYAA*, and *ACTB2*, which are known to have brain-specific (Ahrens et al., 2012), lens-specific (Posner  
80 et al., 2017), and ubiquitous (Gutierrez-Triana et al., 2018) expression, respectively, in teleost fish  
81 (including zebrafish and medaka). After injection of CRISPR/Cas9 reagents into one-cell stage killifish  
82 embryos, we waited 14–21 days for the embryos to develop and visually screened embryos for Venus  
83 fluorescence – indicative of protein expression and suggestive of successful CRISPR/Cas9-mediated  
84 knock-in. We observed Venus fluorescent protein expression in the expected tissues: developing brain  
85 for *ELAVL3*-targeted embryos, lens of the eye for *CRYAA*-targeted embryos, and in all cells of the embryo  
86 for *ACTB2*-targeted embryos (Figure 1B). In all embryos screened, we did not observe Venus expression  
87 in a tissue that was not specifically targeted. For all three targeted loci, we observed Venus fluorescence  
88 (suggestive of successful CRISPR/Cas9-mediated knock-in) in over 40% of developed embryos (Figure  
89 1C). We achieved the highest CRISPR/Cas9-mediated knock-in efficiency using both a chemically-  
90 modified dsDNA HDR template (modification #3, see Methods) and HDR chemical enhancer compared  
91 to the use of unmodified HDR template without enhancer for the *ELAVL3* locus (Figure 1C; Figure 1—  
92 figure supplement 1A), so we used this approach for all subsequent constructs. We did not observe  
93 differences in lethality of embryos injected with CRISPR/Cas9 knock-in reagents (including chemically-  
94 modified dsDNA HDR template and/or HDR chemical enhancer) compared to non-injected embryos  
95 (Figure 1—figure supplement 1B). Importantly, we confirmed that the genomic knock-in occurred at the  
96 expected genomic locus by PCR genotyping with primers surrounding the insertion site for each gene  
97 (Figure 1D; Supplemental Table 1) (see below for sequencing confirmation in the F1 generation). Thus,  
98 this CRISPR/Cas9-mediated knock-in method allows for precise and efficient editing at several loci,  
99 including tissue-specific ones.

100

### 101 **Germline transmission of CRISPR/Cas9-mediated knock-in and generation of stable lines**

102 A key aspect of genome editing is germline transmission to allow the generation of genetically-  
103 modified lines. To determine if the CRISPR/Cas9-mediated insertion can be transmitted to the next  
104 generation, we evaluated the efficiency of germline transmission using transgenic *ELAVL3-T2A-Venus*  
105 founders (F0s). Sixty-seven percent of F0 founders, when crossed with wildtype fish, produced Venus-  
106 positive F1 progeny (Figure 2A, B). Given the high efficiency of germline transmission and the rapid  
107 generation time of killifish, we tested if we could directly generate homozygous F1 animals by inter-

108 crossing genetically modified F0 individuals (Figure 2C, D). Upon inter-crossing Venus-positive F0  
109 founders, we found that 85% of the resulting F1 Venus-positive progeny were homozygous for the  
110 insertion at the *ELAVL3* locus (Figure 2D). PCR amplification and genotyping by Sanger sequencing of  
111 homozygous F1 animals confirmed that the *T2A-Venus* integration at the *ELAVL3* locus was as  
112 designed—single-copy and in frame (Figure 1E; Figure 2A, C, D; Figure 2—figure supplement 1). Venus-  
113 positive *ELAVL3-T2A-Venus* F1 progeny exhibit specific and strong Venus expression throughout the  
114 nervous system including the retina, brain, and spinal cord at the larval stage (Figure 2E), which is  
115 expected given that the *ELAVL3* promoter is commonly used as a pan-neuronal promoter in larval  
116 zebrafish (Ahrens et al., 2012) (see Figure 3 below for expression in adult brains). We tested for potential  
117 off-target insertions/mutations upon CRISPR/Cas9-mediated knock-in. PCR amplification and Sanger  
118 sequencing of homozygous F1 *ELAVL3-T2A-Venus* animals at the three most likely off-target sites  
119 (predicted by CHOPCHOP (Labun et al., 2019)) showed no off-target editing at these sites (Figure 2—  
120 figure supplement 2). While there could be insertions at other sites in the genome, the observation that  
121 the expression pattern of Venus recapitulates that of the known endogenous gene (for *ELAVL3*, *CRYAA*,  
122 *ACTB2*, and other loci, see Figure 4) supports the notion that in-frame off-target insertions are rare with  
123 this method. In rare cases where off-target insertions would occur, they could be eliminated by  
124 backcrossing lines with wildtype fish. Hence, this method enables generation of stable lines of  
125 homozygous transgenic vertebrate animals in 2–3 months.

126

## 127 **Insertion of long sequences into the genome to drive gene expression in a cell- or tissue-specific** 128 **manner**

129 We asked if this CRISPR/Cas9-mediated insertion method could be used to insert longer  
130 sequences into the killifish genome for expression in specific cells or tissues. The insertion of long  
131 sequences at a precise genomic location, while technically challenging, is critical for leveraging the cell-  
132 type or tissue specificity of a particular locus to drive ectopic expression of specific genes or molecular  
133 probes. We designed a longer dsDNA HDR template that would result in a 1.8 kb long insertion sequence.  
134 This HDR template includes two consecutive fluorescent proteins (Venus and oScarlet) targeted to the  
135 *ELAVL3* locus, with *T2A* and *P2A* sequences (encoding another self-cleaving peptide) 5' to each  
136 fluorescent protein, respectively, to avoid direct fusion. The oScarlet was also tagged with the nuclear  
137 localization signal (NLS) from Histone 2B to allow nuclear localization of this fluorescent protein (Kanda  
138 et al., 1998; Schrodell et al., 2013). The resulting insertion sequence is 1.8 kb long – a length that would  
139 encode proteins of ~600 amino acids and ~65 kDa (Figure 3A; Supplemental Table 1). We observed  
140 successful CRISPR/Cas9-mediated knock-in of this longer sequence in ~50% of developed embryos  
141 (Figure 3B). There was no decrease in efficiency for this longer insertion relative to the shorter (0.8 kb)  
142 insertion previously tested at the same locus (Figure 3B). PCR amplification and genotyping by Sanger  
143 sequencing of homozygous F1 animals confirmed that the *T2A-Venus-P2A-H2B-oScarlet* integration at

144 the *ELAVL3* locus was the expected size and in frame without mutations (Figure 3C; Supplemental Table  
145 1). PCR amplification and Sanger sequencing of homozygous F1 animals at the three predicted most  
146 likely off-target sites showed no off-target editing in these fish either (Figure 3—figure supplement 1).  
147 Imaging coronal brain sections of adult F1 *ELAVL3-T2A-Venus-P2A-H2B-oScarlet* killifish showed cells  
148 (likely neurons) expressing both oScarlet and Venus (Figure 3D). As expected, oScarlet expression was  
149 confined to nuclei while Venus expression was seen in both cell bodies and projections (Figure 3D).  
150 Imaging the whole brain of adult *ELAVL3-T2A-Venus-P2A-H2B-oScarlet* killifish revealed oScarlet-  
151 positive nuclei throughout the brain (Figure 3E). Thus, this method allows for pan-neuronal expression in  
152 the adult brain and could be leveraged to drive expression of molecular tools (e.g., the optogenetic ion  
153 channel channelrhodopsin [~1 kb] (Boyden et al., 2005) or the genetically-encoded calcium indicator  
154 GCaMP [~1.3 kb] (Ahrens et al., 2012)) in a neuronal-specific manner.

155

### 156 **Cell-type-specific expression in subsets of neurons by targeting neuropeptide loci**

157 We determined if this CRISPR/Cas9-mediated insertion could be used to build killifish reporter  
158 lines for specific cell types, notably neuronal subpopulations. This development is critical for systems  
159 neuroscience, including circuit-based studies. We focused on targeting neurons expressing neuropeptide  
160 Y (NPY) and hypocretin (HCRT). These neuronal populations are critical for organismal homeostasis  
161 through modulation of behaviors, including feeding behavior (Jeong et al., 2018) and sleep-wake  
162 behavior (Chiu and Prober, 2013; Prober et al., 2006; Singh et al., 2017). Growing evidence also suggests  
163 that these neuronal populations may be altered with age (Fronczek et al., 2012; Hunt et al., 2015;  
164 Montesano et al., 2019). We designed a dsDNA HDR template encoding Venus targeting the *NPY* or  
165 *HCRT* locus and with a *T2A* sequence 5' to the fluorescent protein sequence to avoid direct fusion  
166 between the neuropeptide and the fluorescent protein (Figure 4A; Supplemental Table 1). PCR  
167 amplification and genotyping by Sanger sequencing of F1 animals confirmed that the *T2A-Venus*  
168 integration at the *NPY* or *HCRT* locus was as designed—single-copy and in frame at the targeted  
169 genomic location (Figure 4A; Figure 4—figure supplement 1; Supplemental Table 1). Imaging of coronal  
170 brain sections of the adult *HCRT-T2A-Venus* killifish line showed a dense and isolated population of  
171 Venus-positive cell bodies in the dorsal periventricular hypothalamus (Hd; homologous to the mammalian  
172 arcuate nucleus) (Appelbaum et al., 2009; Biran et al., 2015; D'Angelo, 2013; Montesano et al., 2019)  
173 (Figure 4B). In contrast, the adult *NPY-T2A-Venus* line exhibited Venus-positive cell bodies throughout  
174 the brain, including in the periventricular and lateral hypothalamus, as well as in the periventricular gray  
175 zone (PGZ) of the optic tectum (OT) (Figure 4C). The expression profiles observed in the *NPY-T2A-*  
176 *Venus* and *HCRT-T2A-Venus* lines are consistent with *in situ* hybridization of endogenous *NPY* and  
177 *HCRT* transcripts in wildtype animals (Figure 4—figure supplement 2; Supplemental Table 3), and also  
178 consistent with *NPY* and *HCRT* expression previously reported in the adult killifish and zebrafish brain  
179 (Appelbaum et al., 2009; Biran et al., 2015; D'Angelo, 2013; Montesano et al., 2019). The generation of

180 these lines serves as proof of principle that CRISPR/Cas9-mediated knock-in is a powerful method in  
181 killifish to drive cell-type-specific expression. These neuron-specific lines should also help the  
182 development of the killifish for systems neuroscience studies.

183

## 184 **Discussion**

185 Here we establish an efficient and versatile method for rapid and precise genome engineering of  
186 the short-lived African turquoise killifish. This CRISPR/Cas9-mediated knock-in method can be leveraged  
187 for cell-type- and tissue-specific expression of ectopic genes and reporters to study complex phenotypes  
188 at scale. We observe efficient CRISPR/Cas9-mediated knock-in of large inserts (>40% efficiency) with  
189 germline transmission rates over 65%. This high efficiency of germline transmission may be due to the  
190 relatively slow rate of early cell division after fertilization in the African turquoise killifish (~4 times slower  
191 in this species relative to non-annual teleost fishes) (Dolfi et al., 2014). The killifish model, with hundreds  
192 of embryos produced at a given time (for example using harem breeding), allows for easy and high-  
193 throughput injection of genome-editing machinery into embryos (Harel et al., 2015; Hu and Brunet, 2018;  
194 Kim et al., 2016; Polacik et al., 2016). Moreover, the killifish has the shortest generation time of any  
195 vertebrate model bred in captivity (Hu and Brunet, 2018; Kim et al., 2016). The development of rapid and  
196 efficient knock-in establishes the killifish as a system for precise genetic engineering at scale, which has  
197 been challenging so far in vertebrates. The knock-in method developed here uses reagents that are all  
198 commercially available, eliminating the need for cloning and PCR and making this method easy to adopt.  
199 Together, the steps described here could serve as a blueprint for knock-in approaches in other emerging  
200 model organisms.

201

202 The CRISPR/Cas9-mediated knock-in approach we developed should allow the establishment of  
203 versatile strategies to probe complex phenotypes, including development, ‘suspended animation’,  
204 regeneration, aging, and age-related diseases. Given the potential of the African killifish for modeling  
205 human aging (Hu and Brunet, 2018; Kim et al., 2016; Van Houcke et al., 2021a), this knock-in method  
206 should also allow the generation of human disease models that can be studied longitudinally, over an  
207 entire lifespan. For example, this CRISPR/Cas9-mediated knock-in could be used to introduce human  
208 neurodegenerative disease variants into conserved endogenous killifish loci (e.g., amyloid precursor  
209 protein [*APP*] for Alzheimer’s disease) or to drive neurodegenerative disease variants using a pan-  
210 neuronal promoter. Human disease variant models in mice have been critical to understand disease  
211 mechanisms and treatment strategies (Dawson et al., 2018; Fisher and Bannerman, 2019; Jankowsky  
212 and Zheng, 2017). Human disease models that are scalable and integrate both genetics and age as risk  
213 factors have the potential to identify new strategies to treat these diseases.

214

215           This study highlights the power of knock-in, combined with self-cleaving peptides, to drive cell-  
216 type-specific expression of ectopic genes such as molecular reporters (e.g., fluorescent reporters,  
217 calcium indicators), recombinases (e.g., Cre), and optogenetic tools (e.g., light sensitive ion channels  
218 such as channelrhodopsin). The cell-type resolution of this genetic tool should open studies in a variety  
219 of fields, including systems neuroscience. Additional variations, such as the use of 'landing pads' (for  
220 higher levels of expression) (Soriano, 1999) and inducible promoters (either endogenous or ectopic)  
221 (Gossen and Bujard, 1992; Gossen et al., 1995), could be further developed to complete this toolkit.  
222 Overall, this knock-in method should accelerate the use of the killifish as a scalable vertebrate model and  
223 allow discoveries in several fields, including regeneration, neuroscience, aging, and disease, with  
224 conserved implications for humans.

## 225 Figures

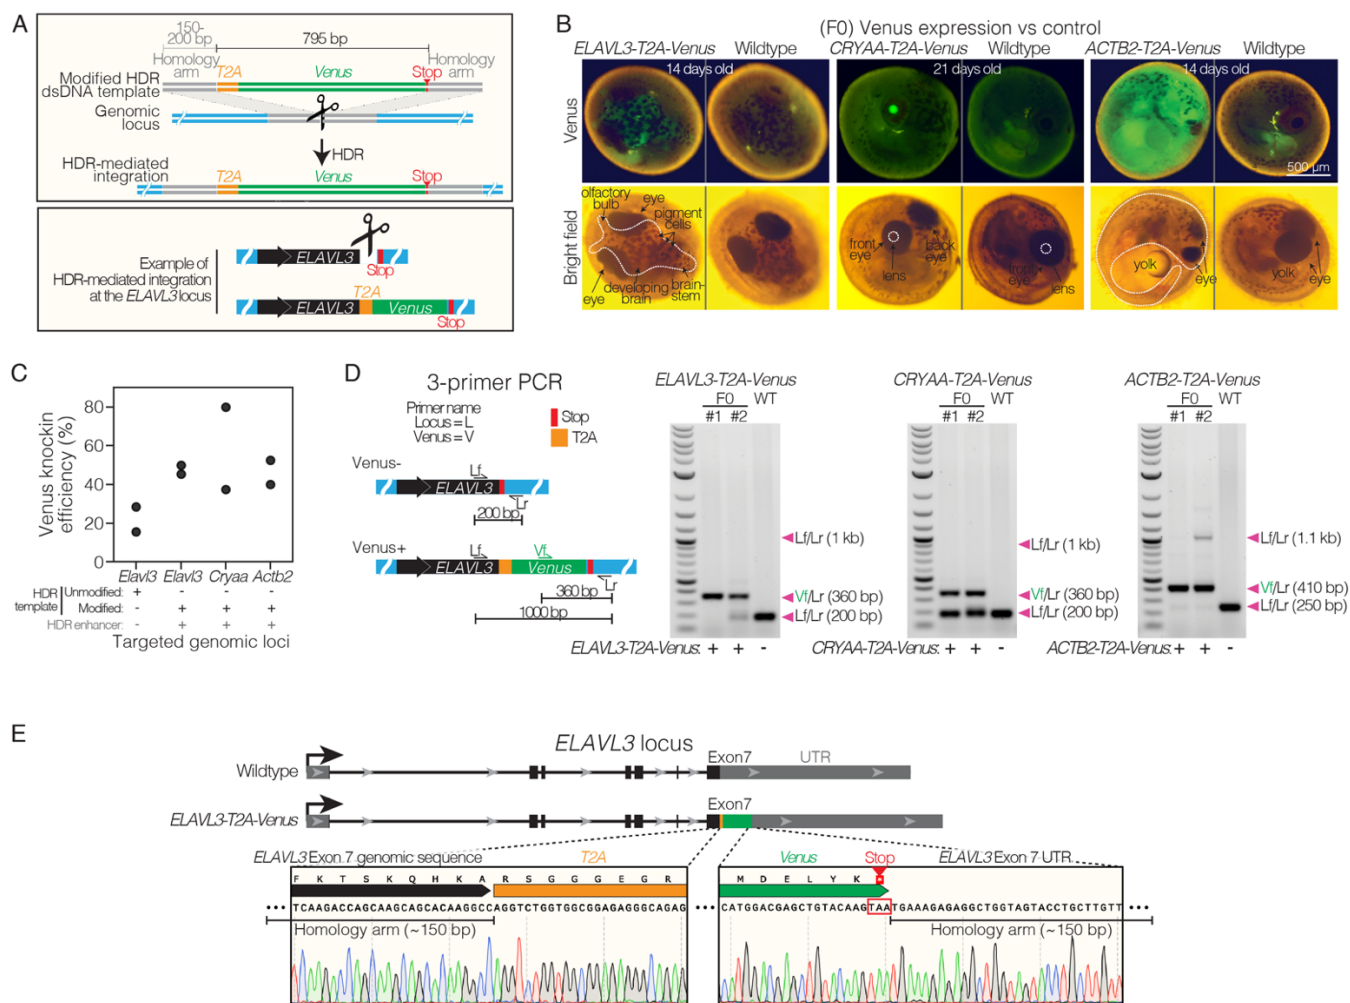

226

### 227 Figure 1: Efficient homology directed repair for precise knock-in at different genomic locations in 228 killifish.

- 229 A. Schematic of *T2A-Venus* insertion at the *ELAVL3* locus.
- 230 B. Images of F0 Venus+ and wildtype 14–21-day-old embryos for each targeted locus (*ELAVL3*,  
 231 *CRYAA*, and *ACTB2*). Twenty-one-day-old embryos were dried on coconut fiber for 7 days prior  
 232 to imaging and have altered autofluorescence compared to 14-day-old embryos that were not yet  
 233 put on coconut fiber.
- 234 C. Efficiency of *T2A-Venus* knock-in at each locus (determined by visual inspection of Venus  
 235 fluorescence in developed embryos) and efficiency of knock-in at *ELAVL3* with a dsDNA HDR  
 236 template lacking chemical modification and without the HDR chemical enhancer; two replicates  
 237 per condition;  $n = 10$ –42 embryos per replicate. Raw data in Supplemental Table 2.
- 238 D. Left, 3-primer PCR schematic showing locus-specific external primers forward (Lf) and reverse  
 239 (Lr) and internal forward Venus primer (Vf). Right, gel images of 3-primer PCR for each locus  
 240 comparing F0 with wildtype (WT) fish. Arrowheads indicate each primer pair and its expected  
 241 amplification product length. Scoring Venus positive (+) or negative (-) for each fish is indicated



242 below the gel images. Note that the relatively large ~1 kb Lf/Lr product in the transgenic F0  
243 animals is likely to be outcompeted by the shorter Vf/Lr amplification product during the PCR  
244 reaction.

245 E. Top, comparison of *ELAVL3* locus for wildtype and *ELAVL3-T2A-Venus*. Bottom, precise in-frame  
246 insertion of *T2A-Venus* in exon 7, immediately before the stop codon of *ELAVL3* and followed by  
247 the *ELAVL3* untranslated region (UTR).

248

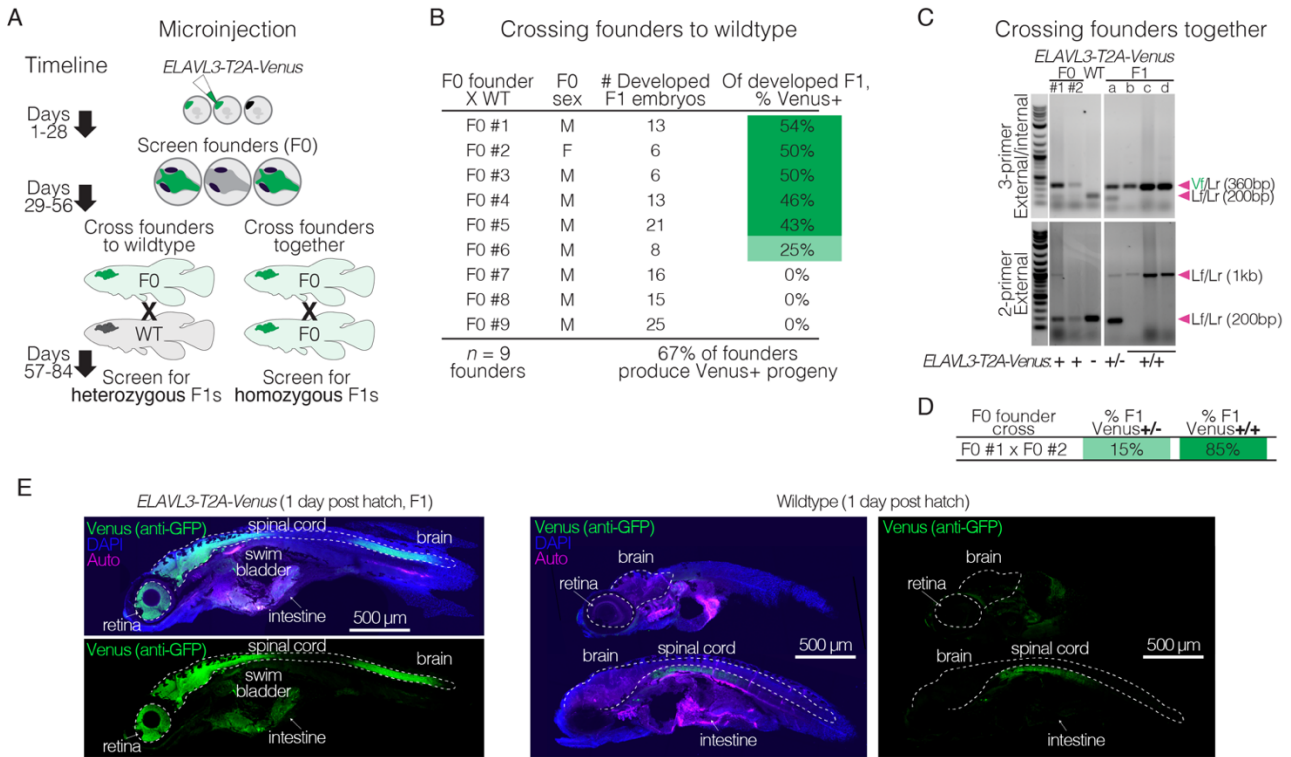

249

250 **Figure 2: Rapid generation of stable knock-in lines in the killifish.**

- 251 A. Schematic of generating a stable knock-in line by either crossing F0 X WT (left) or F0 X F0 (right),  
 252 with timelines to verified heterozygous or homozygous animals.
- 253 B. Germline transmission of *T2A-Venus* at the *ELAVL3* locus was verified by crossing F0 X WT (*n* =  
 254 9 breeding pairs), with between 6–25 developed embryos per pair screened visually or by PCR.
- 255 C. Crossing F0 animals positive for *T2A-Venus* at the *ELAVL3* locus (F0 X F0). Gels showing F0  
 256 parents (left) and F1 progeny (a, b, c, and d; right) with 3-primer PCR (top) and external PCR  
 257 (bottom) using Venus and locus-specific primers shown in Figure 1D. The external PCR shows  
 258 both heterozygous (a) and homozygous (b, c, and d) F1 progeny for *ELAVL3-T2A-Venus*.  
 259 Arrowheads indicate each primer pair and its expected amplification product length. Scoring for  
 260 each lane of the gel is indicated below the gel images. F0 animals are likely mosaic so only “+” or  
 261 “-” was assigned based on the 3-primer PCR result.
- 262 D. Percent of fully developed and Venus+ F1 progeny from the F0 X F0 cross that are heterozygous  
 263 (+/-) or homozygous (+/+) for insertion of *Venus* in *ELAVL3-T2A-Venus* animals.
- 264 E. Sagittal sections of F1 homozygous *ELAVL3-T2A-Venus* (left) compared with wildtype (right)  
 265 killifish 1 day post hatch (larval stage) showing merge of Venus (stained with anti-GFP antibody;  
 266 green), DAPI (nuclei; blue), and autofluorescence (‘Auto’; magenta) as well as separate channel  
 267 for Venus (stained with anti-GFP antibody; green). Scale bar = 500  $\mu$ m.

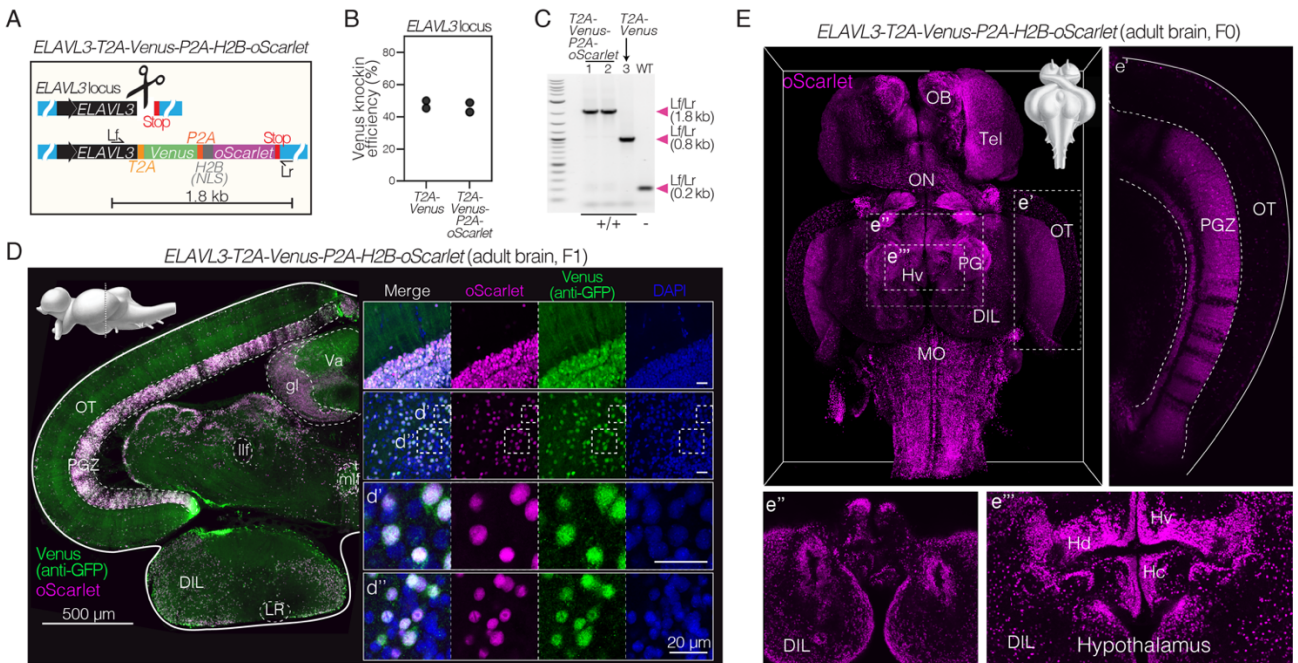

268  
 269 **Figure 3: Efficient and stable knock-in of a large 1.8 kb insertion in killifish.**  
 270 A. Schematic of design of a *T2A-Venus-P2A-H2B-oScarlet* sequence for targeted knock-in at the  
 271 *ELAVL3* locus and locus-specific external primers forward (Lf) and reverse (Lr).  
 272 B. Knock-in efficiency comparing 1.8 kb insertion (*ELAVL3-T2A-Venus-P2A-H2B-oScarlet*) to the 0.8  
 273 kb insertion (*ELAVL3-T2A-Venus*) determined by visual inspection of developed embryos for  
 274 Venus fluorescence; two independent replicates per condition;  $n = 10-86$  embryos per replicate.  
 275 Raw data in Supplemental Table 2.  
 276 C. PCR amplification at the *ELAVL3* locus using locus-specific external primers forward (Lf) and  
 277 reverse (Lr) shown in (A) comparing amplicon length from two F1 *ELAVL3-T2A-Venus-P2A-H2B-*  
 278 *oScarlet* animals (lane 1 and 2), one F1 *ELAVL3-T2A-Venus* animal (lane 3), and one wildtype  
 279 animal (lane WT), showing a single band at the expected length in each case. Scoring for each  
 280 lane of the gel is indicated below the gel image.  
 281 D. Left, coronal brain section of adult (3 months old) *ELAVL3-T2A-Venus-P2A-H2B-oScarlet*  
 282 heterozygous F1 male, showing expression of Venus and oScarlet. Scale bar = 500  $\mu\text{m}$ . Upper left  
 283 corner, sagittal view of the *N. furzeri* brain adapted from (D'Angelo, 2013) indicating the plane of  
 284 the coronal section. Right, select regions showing separate channels for oScarlet (magenta),  
 285 Venus (stained with anti-GFP antibody; green), DAPI (nuclei; blue) as well as merged channels.  
 286 (d') and (d''): zoomed in individual cells. Scale bar = 20  $\mu\text{m}$ . oScarlet expression is confined to  
 287 nuclei while Venus expression is observed throughout cell bodies and projections.  
 288 E. Brain-wide expression of nuclear-localized oScarlet (magenta) in adult (1 month old) *ELAVL3-T2A-*  
 289 *Venus-P2A-H2B-oScarlet* F0 male. Select regions are highlighted: (e') the optic tectum (OT), (e'')  
 290 the most ventral view of the hypothalamus, and (e''') the periventricular hypothalamus.

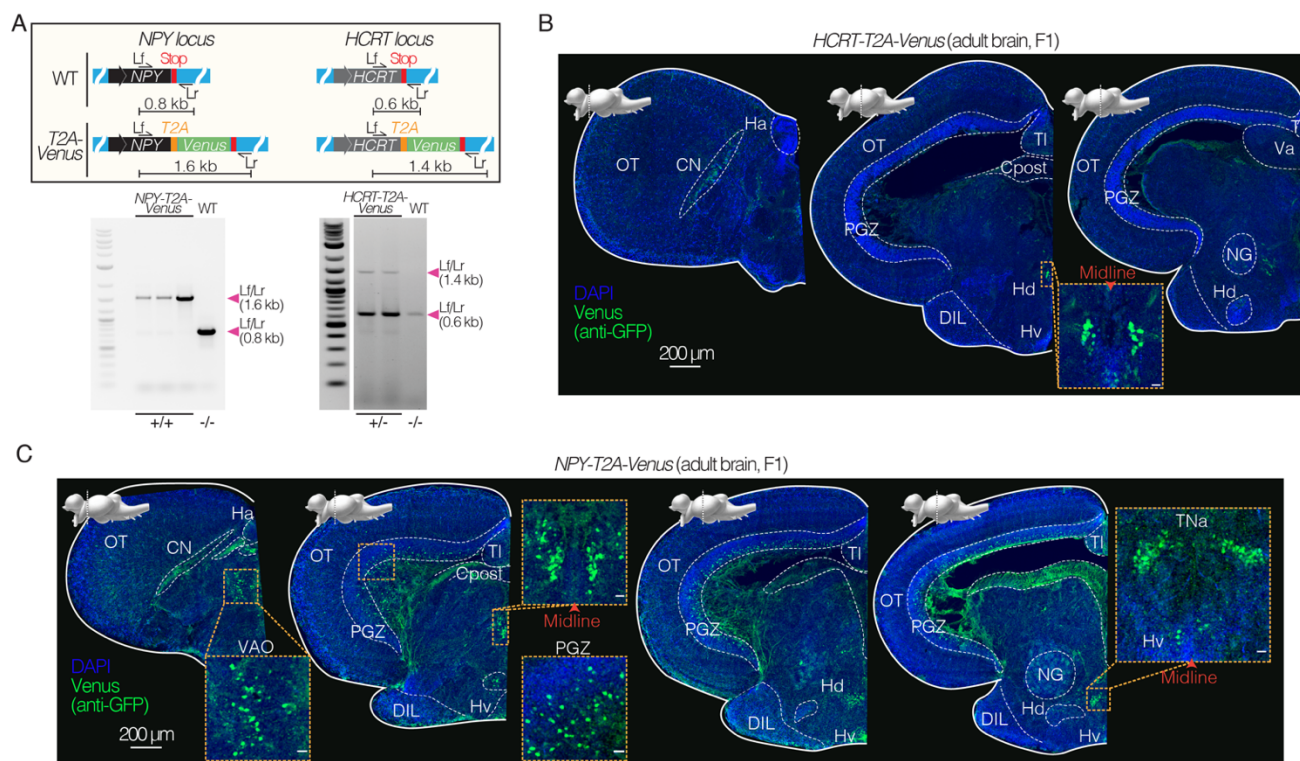

291

292 **Figure 4: Expression in specific neuronal populations using CRISPR/Cas9 knock-in lines in**  
 293 **killifish.**

294 A. Top, schematics of design of *T2A-Venus* sequence for targeted knock-in at the *NPY* and *HCRT*  
 295 loci including locus-specific external primers forward (Lf) and reverse (Lr). Bottom, PCR  
 296 amplification at the *NPY* or *HCRT* locus comparing amplicon length from *NPY-T2A-Venus* (F1  
 297 animals) versus wildtype (WT) and comparing amplicon length from *HCRT-T2A-Venus* (F1  
 298 animals) versus wildtype (WT).

299 B. Coronal brain sections of adult (4 months old) *HCRT-T2A-Venus* female (heterozygous F1),  
 300 showing Venus expression (stained with anti-GFP antibody; green) and DAPI (nuclei; blue). Scale  
 301 bar = 200  $\mu$ m. Distinct nuclei indicated and labeled with abbreviated names. Above each slice is  
 302 the sagittal view of the *N. furzeri* brain adapted from (D'Angelo, 2013) indicating the plane of the  
 303 coronal section. Inset shows zoom in on Venus positive population of cells in the dorsal  
 304 hypothalamus close to the midline. Scale bar = 20  $\mu$ m.

305 C. Coronal brain sections of adult (3.5 months old) *NPY-T2A-Venus* male (homozygous F1),  
 306 showing Venus expression (stained with anti-GFP antibody; green) and DAPI (nuclei; blue). Scale  
 307 bar = 200  $\mu$ m. Distinct nuclei indicated and labeled with abbreviated names. Above each slice is  
 308 the lateral view of the *N. furzeri* brain adapted from (D'Angelo, 2013) indicating the plane of the  
 309 coronal section. Insets show zoom in on the Venus positive populations. Scale bar = 20  $\mu$ m.

310 **Supplemental Figures**

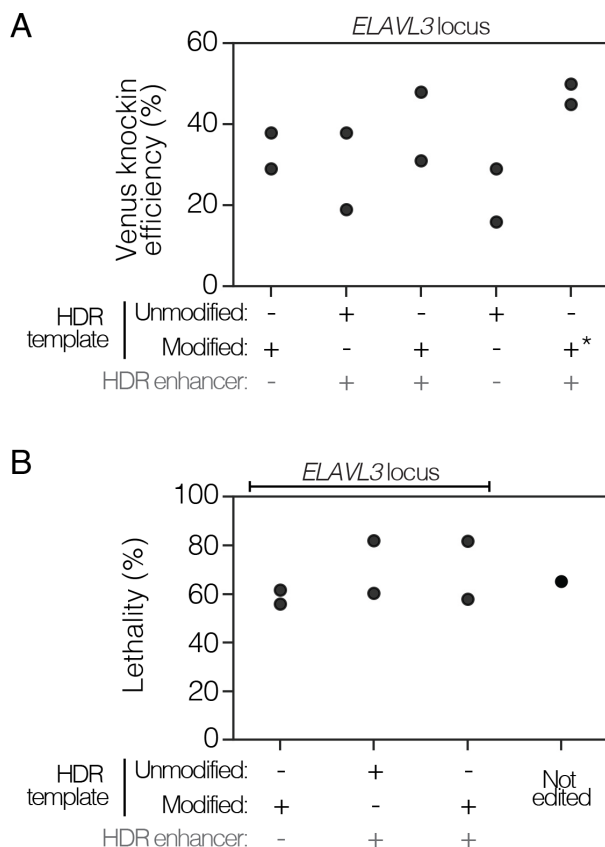

311

312 **Figure 1—figure supplement 1: Comparing knock-in efficiency and lethality of chemically**  
 313 **modified dsDNA HDR templates and HDR chemical enhancers.**

314 A. Knock-in efficiency of different knock-in reagents for insertion of *T2A-Venus* at the *ELAVL3* locus  
 315 comparing the use of chemically modified dsDNA HDR templates versus unmodified dsDNA HDR  
 316 templates, and the use of HDR chemical enhancers (+/- HDR enhancer). Two types of HDR  
 317 modifications were tested: modification #1 and modification #3. The use of modification #3 is  
 318 indicated by (\*). Modification #3 was used for all subsequent work in this paper (see Methods).  
 319 Two replicates per condition;  $n = 10-105$  embryos per replicate. Raw data in Supplemental Table  
 320 2.

321 B. Lethality over two weeks after CRISPR/Cas9-mediated knock-in with different knock-in reagents  
 322 for insertion of *T2A-Venus* at the *ELAVL3* locus, compared to non-injected (not edited) control.  
 323 Two replicates per knock-in condition. Raw data in Supplemental Table 2.

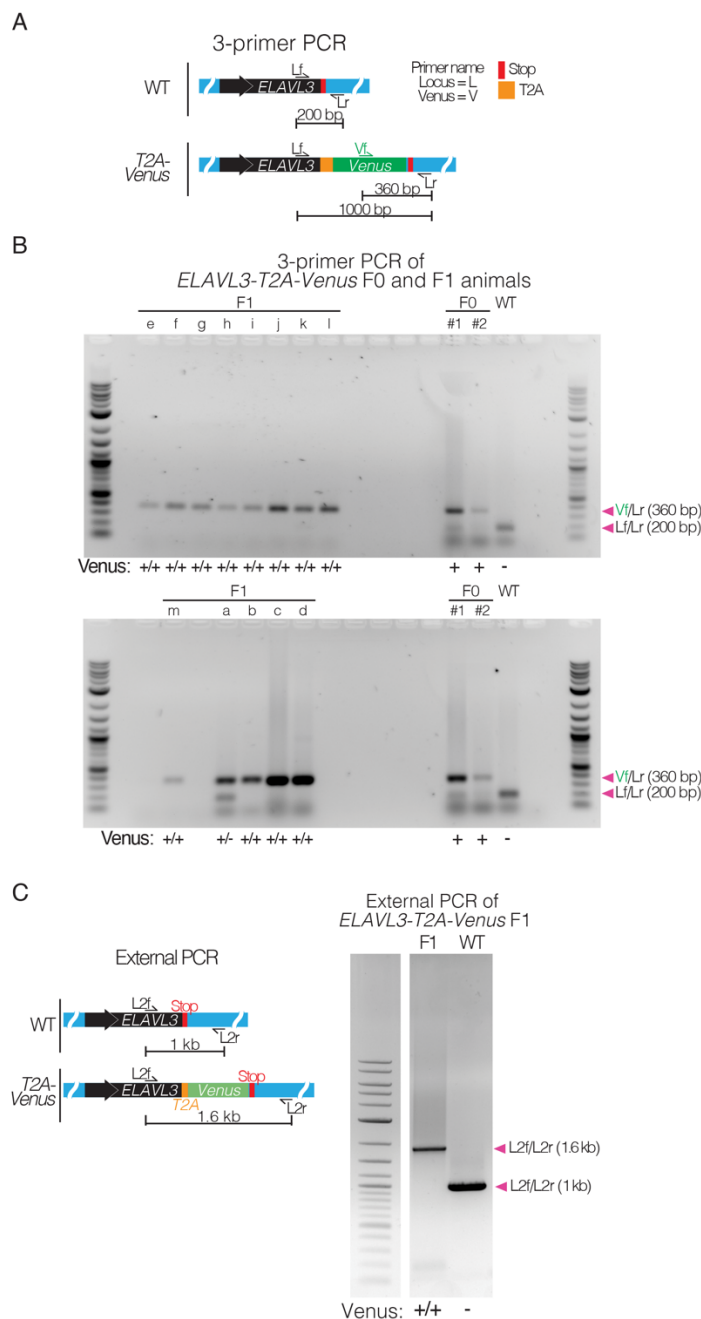

324

325 **Figure 2—figure supplement 1: PCR amplification of F0 parents and F1 progeny confirms *T2A-***  
 326 ***Venus* integration and germline transmission at the *ELAVL3* locus.**

327 A. 3-primer PCR schematic showing locus-specific external primers forward (Lf) and reverse (Lr)  
 328 and internal Venus forward primer (Vf) at the *ELAVL3* locus.

329 B. Crossing F0 animals positive for *T2A-Venus* at the *ELAVL3* locus (F0 X F0). Gels showing F0  
 330 parents (right) and F1 progeny (a, b, c, and d; left) with 3-primer PCR using Venus and locus-  
 331 specific primers shown in (A). Arrowheads indicate each primer pair and its expected amplification  
 332 product length. Scoring for each lane of the gel is indicated below the gel images. Full gel images  
 333 of 3-primer PCR on F0 and F1 animals for gels shown in Figure 2C.

334 C. PCR amplification at the *ELAVL3* locus of F1 homozygous *ELAVL3-T2A-Venus* killifish compared  
335 to WT with forward and reverse primers external to the homology arms (i.e., external PCR).  
336 *ELAVL3-T2A-Venus* killifish produce a band at the expected length (1.6 kb). Arrowheads indicate  
337 each primer pair and its expected amplification product length. Scoring for each well of the gel is  
338 indicated below the gel images.

339

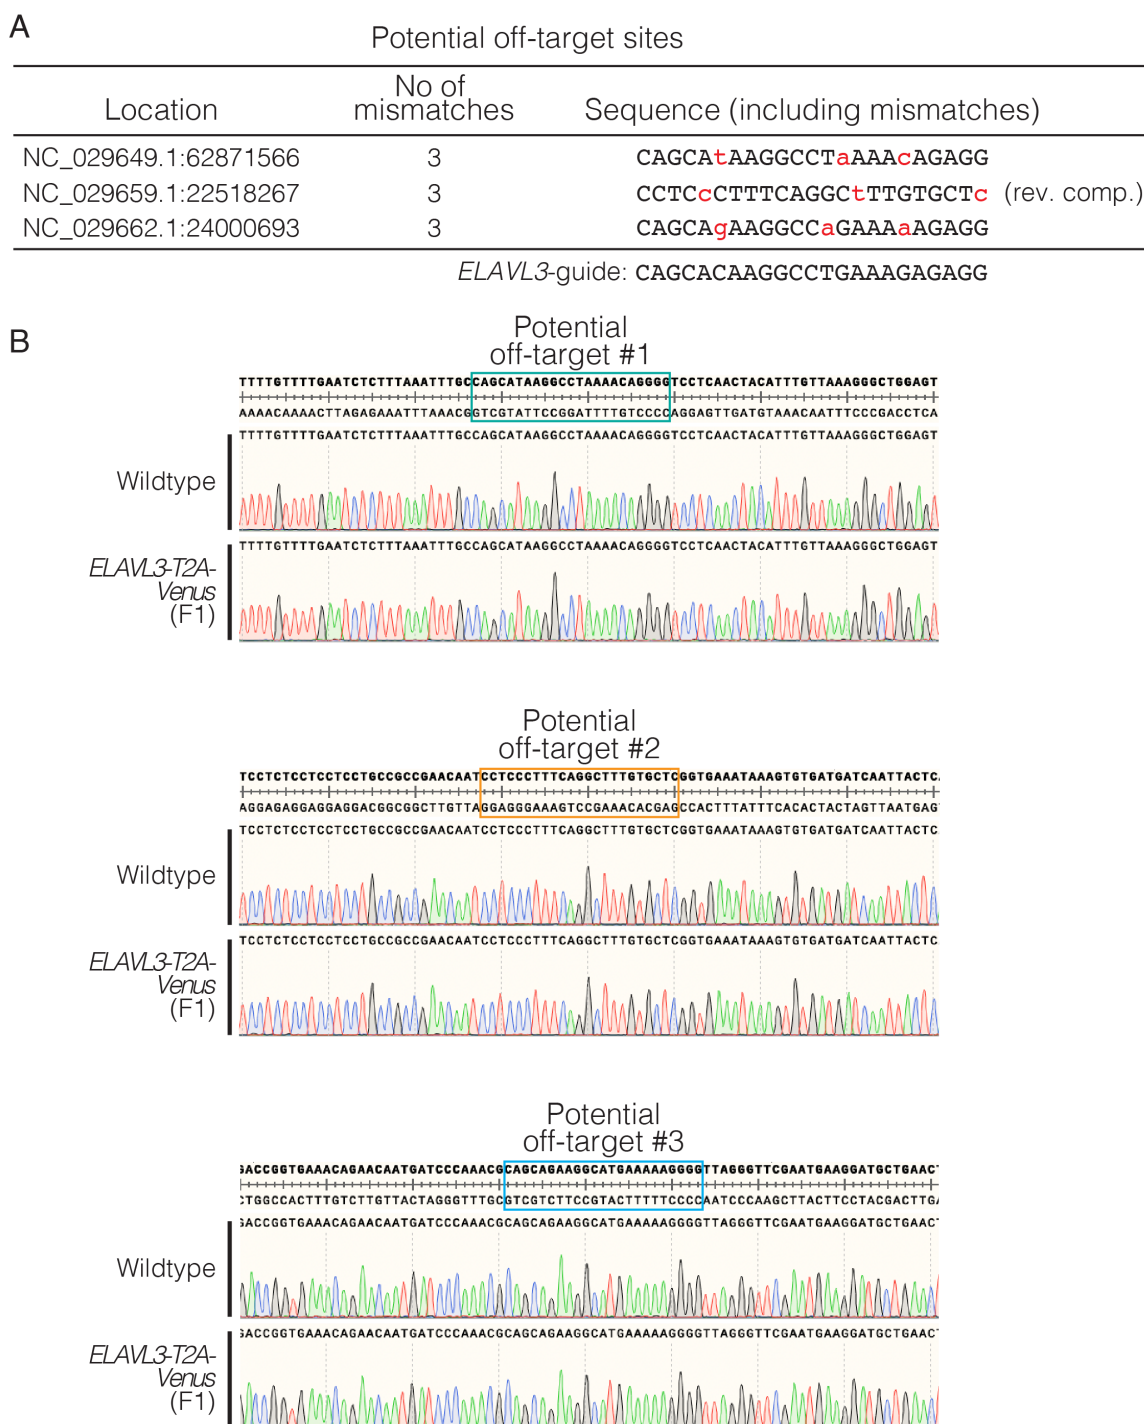

340  
 341 **Figure 2—figure supplement 2: Evaluating potential off-target effects in homozygous F1**  
 342 **CRISPR/Cas9 knock-in fish.**

343 A. The predicted most likely off-target sites for the *ELAVL3* gRNA (predicted using CHOPCHOP).  
 344 These three loci each have three mismatches from the *ELAVL3* gRNA (indicated by lowercase,  
 345 red text).



346 B. Sequencing results of *ELAVL3-T2A-Venus* homozygous F1 (generated by crossing F0s) at the  
347 three predicted most likely off-target sites. No off-target editing was observed at any of the  
348 predicted off-target sites.

349

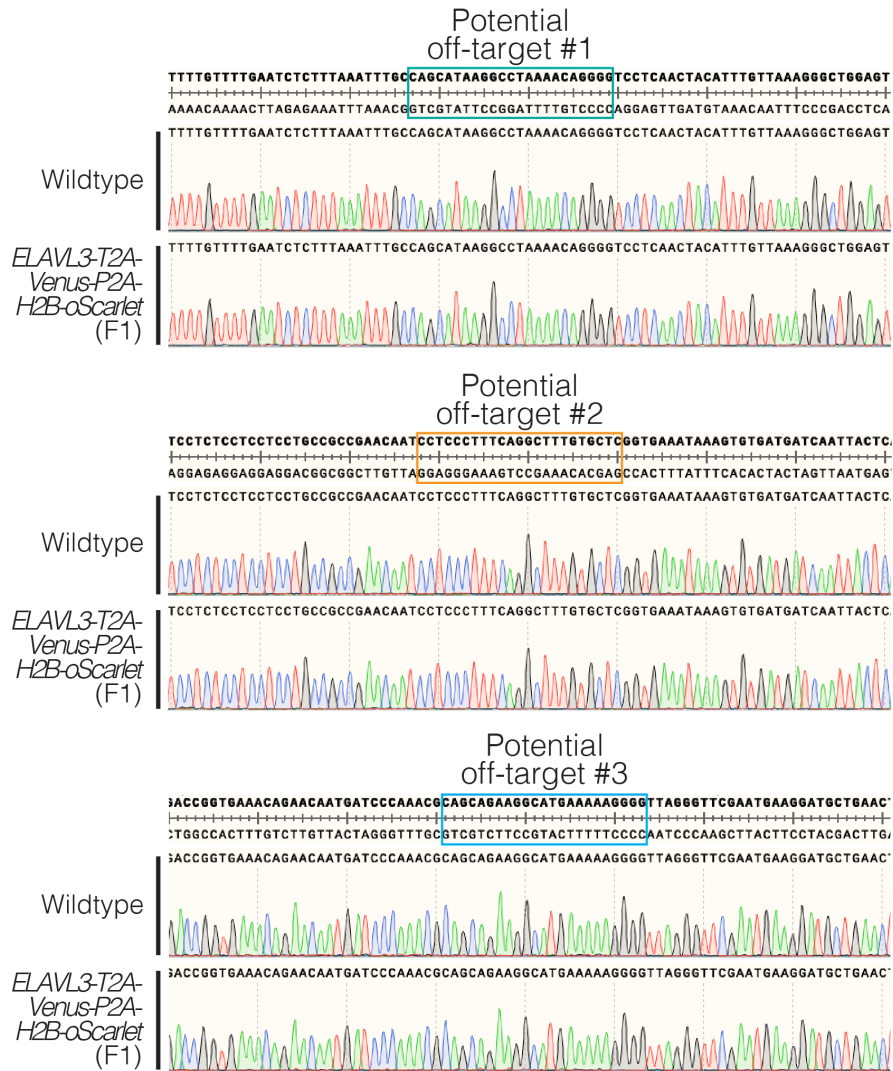

350  
351 **Figure 3—figure supplement 1: Evaluating potential off-target effects in homozygous F1**  
352 **CRISPR/Cas9 knock-in fish.**

353 Sequencing results of *ELAVL3-T2A-Venus-P2A-H2B-oScarlet* homozygous F1 (generated by  
354 crossing F0s) at the three predicted most likely off-target sites. No off-target editing was observed  
355 at any of the predicted off-target sites.

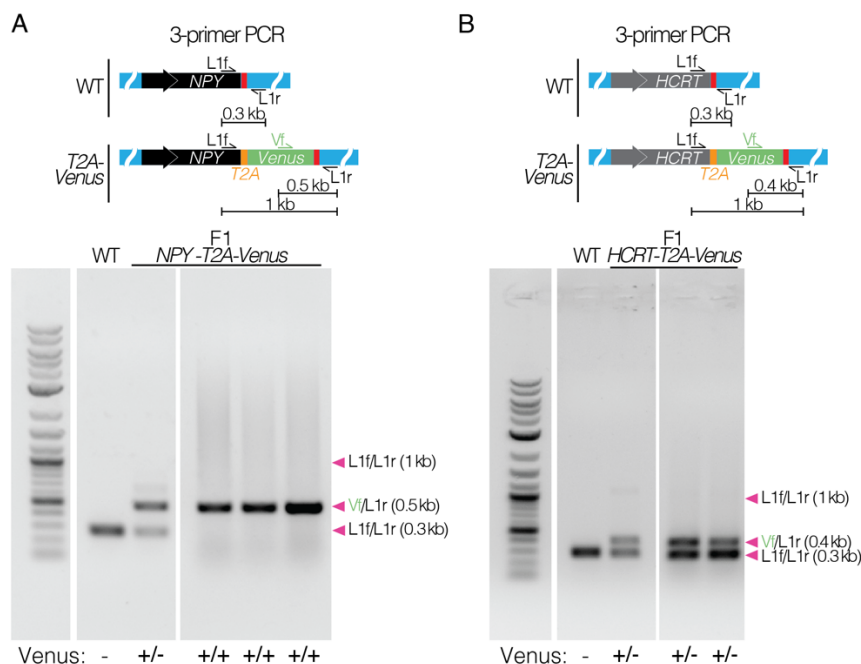

356

357 **Figure 4—figure supplement 1: Confirming knock-in by PCR amplification and sequencing.**

358 A. 3-primer PCR amplification at the *NPY* locus of F1 heterozygous and homozygous *NPY-T2A-*  
 359 *Venus* killifish compared to WT. Arrowheads indicate each primer pair and its expected  
 360 amplification product length. Scoring Venus negative (-), heterozygous (+/-), or homozygous (+/+)  
 361 for each well of the gel is indicated below the gel images. The PCR product was sequenced and  
 362 confirmed.

363 B. 3-primer PCR amplification (schematic and gel images) at the *HCRT* locus of F1 heterozygous  
 364 *HCRT-T2A-Venus* killifish compared to WT. Arrowheads indicate each primer pair and its  
 365 expected amplification product length. Scoring Venus negative (-), heterozygous (+/-), or  
 366 homozygous (+/+) for each well of the gel is indicated below the gel images. The PCR product  
 367 was sequenced and confirmed.

368

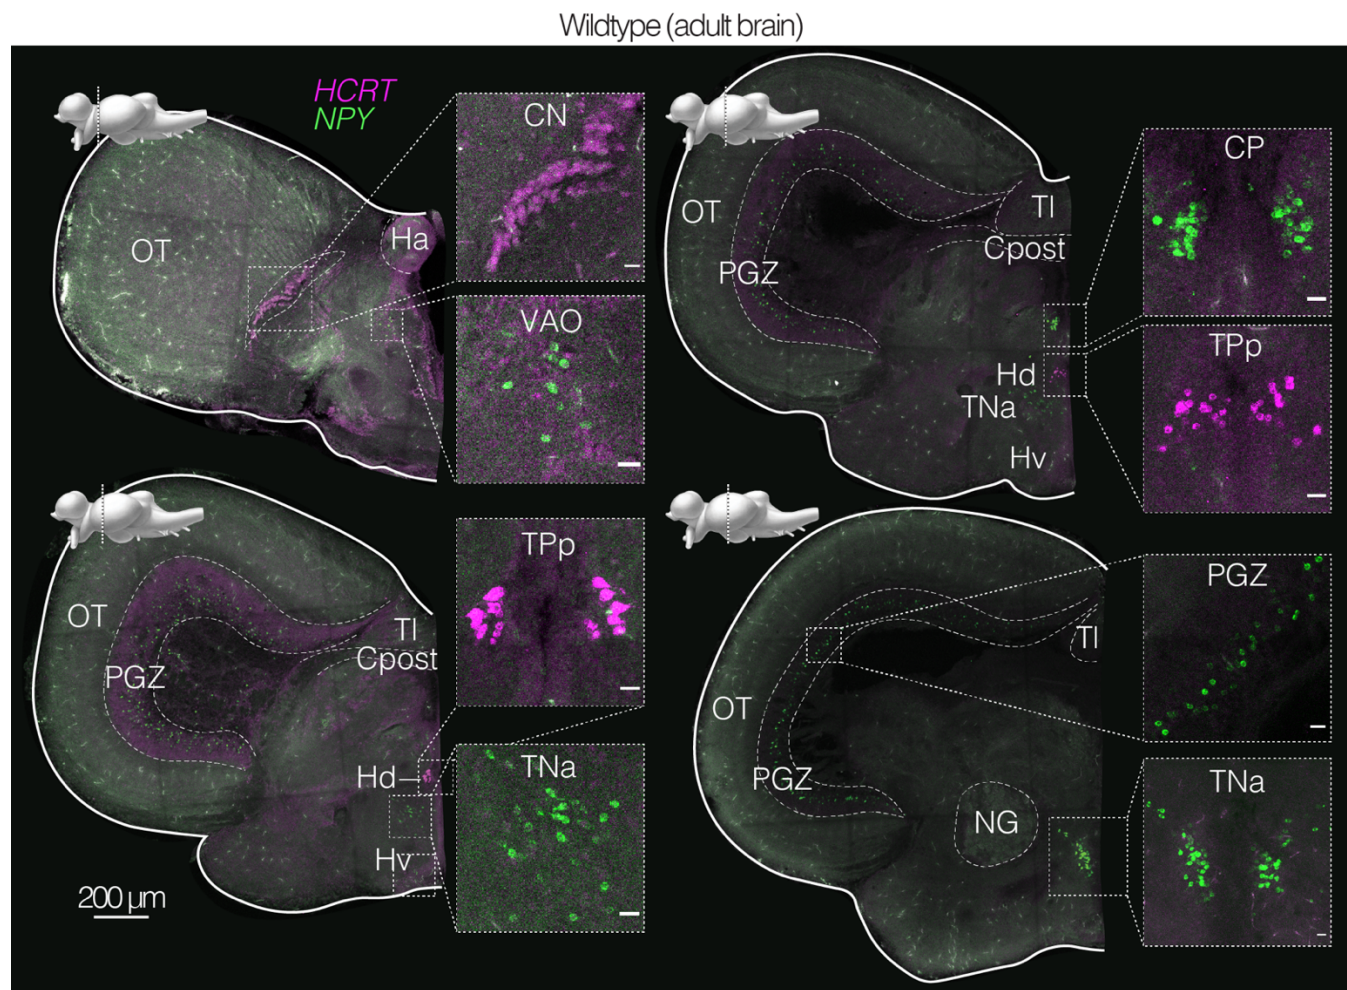

369

370 **Figure 4—figure supplement 2: *In situ* hybridization chain reaction (HCR) of endogenous *NPY* and**  
371 ***HCRT* transcripts in the adult brain of wildtype killifish.**

372 Coronal brain sections of an adult (3 months old) wildtype male, with HCR labeling endogenous  
373 *NPY* (green) and *HCRT* (magenta) transcripts (using gene-specific probe sets, Supplemental  
374 Table 3). Scale bar = 200  $\mu\text{m}$ . Distinct nuclei indicated and labeled with abbreviated names.  
375 Above each slice is the sagittal view of the *N. furzeri* brain adapted from (D'Angelo, 2013)  
376 indicating the plane of the coronal section. Inset shows zoom in on *NPY* and *HCRT* positive  
377 population of cells. Scale bar = 20  $\mu\text{m}$ .

## 378 **Methods**

### 379 African turquoise killifish care and husbandry.

380 African turquoise killifish (GRZ strain) were maintained according to established guidelines (Astre et al.,  
381 2022b; Reichard et al., 2022; Zak et al., 2020). Briefly, animals were housed at 26–27°C in a central  
382 filtration recirculating system (Aquaneering, San Diego) at a conductivity between 3800–4000  $\mu\text{S}/\text{cm}$  and  
383 a pH between 6.5–7.0, with a daily exchange of 10% water treated by reverse osmosis (i.e., RO water).  
384 Animals were kept on a 12-hour light/dark cycle and were fed twice a day on weekdays and once a day  
385 on weekends. Adult fish (>1 month of age) were fed dry fish food (Otohime fish diet, Reed Mariculture,  
386 Otohime C1) while young fish (<1 month of age) were fed freshly hatched brine shrimp (Brine Shrimp  
387 Direct, BSEP6LB). Killifish embryos were raised in Ringer's solution (Sigma-Aldrich, 96724), with two  
388 tablets per liter of RO water and 0.01% methylene blue (i.e., embryo solution) at 26–27°C in 60 mm x 15  
389 mm petri dishes (E and K Scientific, EK-36161) at a density of <100 embryos per plate. After two weeks  
390 in embryo solution, embryos were transferred to moist autoclaved coconut fiber (Zoo Med Eco Earth  
391 Loose Coconut Fiber) lightly packed in petri dishes where they were incubated for another two weeks at  
392 26–27°C. After 2–3 weeks on moist coconut fiber, embryos were hatched. For hatching, embryos were  
393 placed in humic acid solution (1 g/l, Sigma-Aldrich, 53680 in RO water) and incubated overnight at room  
394 temperature. All animals were raised in accordance with protocols approved by the Stanford  
395 Administrative Panel on Laboratory Animal Care (protocol # APLAC-13645).

396

### 397 Design of guide RNA sequences.

398 For each selected gene, gRNA target sites were identified using CHOPCHOP (Labun et al., 2019) ([https://](https://chopchop.rc.fas.harvard.edu/)  
399 [chopchop.rc.fas.harvard.edu/](https://chopchop.rc.fas.harvard.edu/)) with the Nfu\_20140520/Jena genome. One guide sequence was selected  
400 for each target gene of interest. Guide sequences were only selected if followed by the PAM site (5'-  
401 NGG-3') for *Streptococcus pyogenes* Cas9. The Cas9 cut sites were between 1–15 bp from the target  
402 insertion site. Guide RNAs were designed for compatibility with Integrated DNA Technology's (IDT,  
403 Coralville, IA) Alt-R™ method. For detailed methods and design tools see [www.idtdna.com](http://www.idtdna.com). All Alt-R  
404 CRISPR RNAs (crRNAs) and universal trans-activating crRNA (tracrRNA) were chemically synthesized  
405 (2 nmol, IDT). Synthetic Alt-R™ crRNA and tracrRNA were resuspended in nuclease-free duplex buffer  
406 (IDT) to a final concentration of 100  $\mu\text{M}$  each and stored at -20°C. The guide sequences of all crRNAs  
407 used in this study are provided in Supplemental Table 1.

408

### 409 Design of DNA templates for HDR.

410 Double-stranded DNA (dsDNA) HDR templates were designed with 150–200 bp homology arms  
411 containing DNA sequences surrounding the target Cas9 cut site. Homology arms began within 1–15 bp  
412 of the Cas9 cut site. All dsDNA HDR templates were synthesized as gBlock Gene Fragments from IDT

413 (0.25–10 µg). Unless otherwise noted, all gBlocks contained IDT’s proprietary chemical modifications at  
414 each end of the sequence that should promote HDR and inhibit blunt-end integration. In this work, we  
415 tested two proprietary chemical modifications from IDT. We found chemical modification #3 worked best  
416 and used it for the majority of the HDR templates used in this study (Figure 1—figure supplement 1A).  
417 gBlocks with this modification #3 are available for purchase through IDT as Alt-R™ HDR Donor Blocks.  
418 gBlocks were resuspended in nuclease-free duplex buffer (IDT) to a concentration of 150 ng/µl and stored  
419 at -20°C. HDR template sequences used in this study are provided in Supplemental Table 1.

420

#### 421 Preparation and microinjection of CRISPR/Cas9 reagents into African turquoise killifish embryos.

422 To prepare the gRNA complex, the tracrRNA and crRNA were mixed in a 1:1 ratio for a final concentration  
423 of 3 µM in nuclease free duplex buffer and annealed by incubation at 95°C for 5 minutes followed by  
424 cooling to room temperature. To form the ribonucleoprotein (RNP) complex, the gRNA complex was  
425 mixed with Cas9 protein (IDT, 1081059; 10 µg/µl) in 1x phosphate-buffered saline (1xPBS; Corning, 21-  
426 040-CV) to final concentrations of 1.5 µM gRNA complex and 0.25 µg/µl Cas9 protein. This mixture was  
427 then incubated at 37°C for 10 minutes followed by cooling to room temperature. The chemically-modified  
428 dsDNA HDR template and IDT’s HDR chemical enhancer (IDT’s Alt-R HDR enhancer Version 2 [V2])  
429 were then added to the RNP complex for injection, for final concentrations of 50 ng/µl gRNA complex,  
430 250 ng/µl Cas9 protein, and 15 ng/µl HDR template. Finally, 0.33 µl of 8% phenol red was added to the  
431 injection mixture for visualization. The mixture was used immediately (within 1 hour of production) and  
432 kept on ice. Preassembled Cas9 RNP complex and synthetic dsDNA HDR templates were injected into  
433 the single cell of one-cell stage killifish embryos in accordance with microinjection procedures described  
434 in (Harel et al., 2015). For each target locus and HDR template, 60–150 embryos were injected. Surviving  
435 injected embryos were maintained in embryo solution at 26–27°C for 2–3 weeks. Embryos were then  
436 transferred to moist autoclaved coconut fiber (Zoo Med Eco Earth Loose Coconut Fiber) lightly packed  
437 in petri dishes where they were incubated for another 2–3 weeks at 26–27°C after which they were  
438 hatched (as described in African turquoise killifish care and husbandry).

439

#### 440 Assessment of genome editing.

441 Visual screening: Visual fluorescence screening of 14–21-day old F0 embryos on a Fluorescent Stereo  
442 Microscope (Leica M165FC; Figure 1B) was conducted to verify successful knock-in of cDNA encoding  
443 fluorescent proteins. Twenty-one-day old embryos were dried on coconut fiber for seven days prior to  
444 imaging.

445 Genotyping: PCR amplification of genomic DNA from fish tail clips was also used to verify successful  
446 knock-in events. For this, we followed protocol described in (Hu et al., 2020). Briefly, caudal fin clips were  
447 taken from 1–3-week-old fish (anesthetized on ice). Clipped fin tissue was digested in 30 µl DirectPCR

448 Lysis Reagent (Mouse Tail) (Viagen, 102-T) with 40 µg/ml Proteinase K (Invitrogen, 25530049) at 55°C  
449 for 2 hrs followed by 100 °C heat inactivation for 10 min. This solution was used as template for PCR  
450 amplification with the following PCR reaction mixture (20 µl): 3 µl crude tail-clip lysis, 1 µl 100 µM primers  
451 (IDT), 10 µl 2x GoTaq® Master Mixes (Promega, M7123), and 6 µl water. The PCR was run for 30–42  
452 cycles. We used primer sets that enabled detection of genome editing based on amplification product  
453 size by gel electrophoresis (Figure 1D; Figure 2C; Figure 2—figure supplement 1; Figure 3C; Figure 4A;  
454 Figure 4—figure supplement 1). The primer sequences used to verify successful editing by genotyping  
455 are provided in Supplemental Table 1.

456 Sequencing: To verify the sequence of successfully edited genomes, PCR amplification of the genomic  
457 DNA from fish tail clips was also sent for sequencing (Molecular Cloning Laboratories, MCLAB,  
458 <https://www.mclab.com/home.php>). The sequencing primer sequences used to verify successful editing  
459 are provided in Supplemental Table 1.

460

#### 461 Tissue histology.

462 For brain sectioning and staining, extracted whole brain samples from 1–4-month-old animals were fixed  
463 overnight in 4% paraformaldehyde in PBS (Santa Cruz Biotechnology, SC281692) at 4°C and then  
464 washed for 12 hrs in 1xPBS (Corning, 21-040-CV) at 4°C with three washes. Fixed samples were  
465 dehydrated in 30% sucrose (Sigma-Aldrich, S3929) in 1xPBS at 4°C overnight or until tissue sunk. Tissue  
466 was then embedded in Tissue-Plus™ OCT (Fisher Scientific, 23-730-571) within plastic embedding  
467 molds. Tissue was then frozen at -20 °C for at least 2 hrs and sectioned (50–100 µm sections) on a  
468 cryostat (Leica CM3050 S) and mounted on glass slides (Fisher Scientific, 12-550-15) and stored at -  
469 20°C.

470 For immunostaining, slides were washed once in 1xPBS at room temperature to remove residual OCT.  
471 Slides were dehydrated and permeabilized in pre-chilled 100% methanol (Sigma-Aldrich, HPLC grade)  
472 with 1% Triton X-100 (Fisher Scientific, BP151) at -20°C for 15 min, followed by washing in 1xPBS at  
473 room temperature. Slides were blocked with 5% Normal Donkey Serum (NDS; ImmunoReagents Inc.,  
474 SP-072-VX10) and 1% Bovine Serum Albumin (BSA; Sigma, A7979) in 1xPBS (“blocking buffer”) for 30  
475 min at room temperature. Slides were washed in 1xPBS with 0.1% Tween-20 (PBST) three times for 10  
476 min each, followed by washing in PBS. Slides were incubated in primary antibody (rabbit GFP Polyclonal  
477 Antibody, ThermoFisher, A-6455) at a 1:250 dilution in blocking buffer overnight at 4°C followed by  
478 washing in PBST three times for 30 min each and then washing in 1xPBS. Slides were incubated in  
479 secondary antibody (donkey anti-rabbit IgG, ThermoFisher, A-31573) at a 1:500 dilution in blocking buffer  
480 for 2 hrs at room temperature followed by washing in PBST three times for 30 min each and then washing  
481 in 1xPBS. Slices were mounted in either ProLong™ Gold Antifade Mountant (ThermoFisher, P36930) or  
482 ProLong Gold Antifade Mountant with DAPI (ThermoFisher, P36931) for imaging.

483

484 *In situ* hybridization chain reaction (HCR).

485 For *in situ* hybridization by hybridization chain reaction (HCR), we followed a protocol described in  
486 (Lovett-Barron et al., 2017). First, hybridization probes were designed according to the split initiator  
487 approach of third generation *in situ* hybridization chain reaction (Choi et al., 2018), which enables  
488 automatic background suppression. Twenty-two-nucleotide long DNA antisense oligonucleotide split  
489 probes were designed for both *NPY* and *HCRT* based on the killifish mRNA sequence (Supplemental  
490 Table 3) and synthesized by IDT (200  $\mu$ M in RNase-free H<sub>2</sub>O). Dye-conjugated hairpins (B3-488 and B5-  
491 546) were purchased from Molecular Instruments. Slides were washed in 1xPBS at room temperature to  
492 remove residual OCT. Slides were dehydrated and permeabilized in pre-chilled 100% methanol (Sigma-  
493 Aldrich, HPLC grade) with 1% Triton X-100 (Fisher Scientific, BP151) at -20°C for 15 min followed by  
494 washing three times in 2X saline sodium citrate (SSC) buffer with 0.1% Tween-20 (2xSSCT; made from  
495 20xSSC, ThermoFisher, AM9763) at room temperature for 30 min each.

496 Slides were equilibrated in hybridization buffer (2xSSCT, 10% (w/v) dextran sulfate [Sigma Aldrich,  
497 D6001], 10% (v/v) formamide [Thermo Fisher, AM9342]) for 30 min at 37°C. Slides were then hybridized  
498 with split probes in hybridization buffer at a probe concentration of 4 nM overnight at 37°C. Slices were  
499 then washed two times in 2xSSCT and 30% (v/v) formamide for 30 min at 37 °C. Slides were washed  
500 two times in 2xSSCT for 30 min each at room temperature. Slides were pre-amplified in amplification  
501 buffer (Molecular Instruments) for 10 min at room temperature. Dye-conjugated hairpins were prepared  
502 according to manufacturer's instructions. Briefly, they were heated to 95°C for 1 min then snap-cooled to  
503 4°C. Amplification was performed by incubating slides in amplification buffer with prepared B3 and B5  
504 probes at concentrations of 120 nM overnight in the dark at room temperature. Slides were washed 3  
505 times with 2xSSCT for 30 min each. Slices were mounted in ProLong™ Gold Antifade Mountant for  
506 imaging.

507

508 Whole-mount tissue clearing.

509 For whole-mount tissue clearing (shown in Figure 3E), extracted whole brain samples from 1–4-month-  
510 old animals were fixed overnight in 4% paraformaldehyde in 1xPBS at 4°C and then washed for 12 hrs  
511 in 1xPBS 4°C with three washes. Fixed brain samples were crosslinked in a SHIELD hydrogel (Park et  
512 al., 2018) overnight in 1–2% SHIELD epoxide reagent (GE38; CVC ThermoSet Specialties of Emerald  
513 Performance Materials) in 0.1 M Carbonate Buffer (pH 8.3) at 37°C and then washed three times for 1 h  
514 each in 1xPBS at 37°C. Samples were cleared for 12–48 hrs (depending on brain size) in 4% sodium  
515 dodecyl sulfate (SDS) at 37°C until optically translucent and then washed three times for 1 h intervals in  
516 1xPBS with 0.1% Tween-20 (PBST) at 37°C. For imaging, samples were then equilibrated in EasyIndex  
517 (RI = 1.52, LifeCanvas Technologies) and mounted.



518

519 Imaging.

520 All samples (unless otherwise noted) were imaged using an Olympus FV1200 confocal microscope  
521 system running Fluoview software, using a 10x 0.6 Numerical Aperture water immersion Olympus  
522 objective. Images were collected at a 5  $\mu\text{m}$  z-step resolution. For higher magnification images in Figure  
523 3D, samples were imaged using a Zeiss LSM900 confocal microscope (Axio Observer) system running  
524 ZEN software (3.0, blue), using a 40x 1.4 Numerical Aperture oil immersion Zeiss objective (Plan-  
525 Apochromat). Images were collected at a 4.5  $\mu\text{m}$  z-step resolution. Single photon excitation was used at  
526 the indicated wavelengths. Entire samples were obtained by mosaic tiling during imaging, reconstructed  
527 using Fluoview software, and viewed and analyzed in Fiji and Aivia software.

528

529 **Acknowledgements:** We thank Drs. Felix Boos, Jing Chen, Tyson Ruetz, and John Bedbrook, as well  
530 as Lucy Xu and Charu Ramakrishnan, and all members of the Brunet lab and Deisseroth lab for their  
531 input on the project and providing feedback on the manuscript. We thank IDT for generously providing  
532 reagents for testing. We thank Rogelio Barajas, Rishad Khondker, Jacob Chung, and Natalie Schmahl  
533 for killifish husbandry support. We thank Rogelio Barajas for managing the killifish room and help with  
534 development and maintenance of lines. This work was supported by R01AG063418 (A.B. and K.D.), the  
535 Glenn Foundation for Medical Research (A.B.), the Simons Foundation (A.B.), the Knight-Hennessy  
536 Scholars Graduate Fellowship (R.N.), the Helen Hay Whitney Postdoctoral Fellowship (C.N.B), the Wu  
537 Tsai Stanford Neuroscience Institute Interdisciplinary Postdoctoral Fellowship (C.N.B), T32 AG0047126  
538 (R.D.N.), and the Iqbal Farrukh & Asad Jamal Center for Cognitive Health in Aging (R.D.N).

539

540 **Author contributions:** R.D.N. and C.N.B. conceptualized the project, with input from K.D. and A.B..  
541 R.D.N. and C.N.B. designed, performed, and analyzed all experiments with help from R.N.. R.D.N.  
542 designed gRNAs and DNA templates for HDR, performed injections for generating lines, and managed  
543 and maintained lines with assistance from C.N.B. and R.N.. C.N.B. developed the protocol for  
544 CRISPR/Cas9-mediated knock-in and performed tissue histology and imaging. R.N. optimized and  
545 performed genotyping and quantified knock-in efficiency with help and guidance from C.N.B and R.D.N..  
546 R.D.N. and C.N.B. wrote the manuscript with help from R.N. and A.B.. All the authors provided intellectual  
547 input and commented on the manuscript.

548

549 **Competing interests:** The authors declare no competing interests.

550 **References:**

- 551 Abitua, P.B., Aksel, D.C., and Schier, A.F. (2021). Axis formation in annual killifish: Nodal coordinates  
552 morphogenesis in absence of Huluwa prepatterning. *bioRxiv*.
- 553 Ahrens, M.B., Li, J.M., Orger, M.B., Robson, D.N., Schier, A.F., Engert, F., and Portugues, R. (2012).  
554 Brain-wide neuronal dynamics during motor adaptation in zebrafish. *Nature* *485*, 471-477.
- 555 Allard, J.B., Kamei, H., and Duan, C. (2013). Inducible transgenic expression in the short-lived fish  
556 *Nothobranchius furzeri*. *J Fish Biol* *82*, 1733-1738.
- 557 Appelbaum, L., Wang, G.X., Maro, G.S., Mori, R., Tovin, A., Marin, W., Yokogawa, T., Kawakami, K.,  
558 Smith, S.J., Gothilf, Y., et al. (2009). Sleep-wake regulation and hypocretin-melatonin interaction in  
559 zebrafish. *Proc Natl Acad Sci U S A* *106*, 21942-21947.
- 560 Astre, G., Atlan, T., Goshtchevsky, U., Shapira, K., Oron-Gottesman, A., Levy, T., Velan, A., Smirnov,  
561 M., Deelen, J., Levanon, E.Y., et al. (2022a). Sex-specific regulation of metabolic health and vertebrate  
562 lifespan by AMP biosynthesis. *bioRxiv*.
- 563 Astre, G., Moses, E., and Harel, I. (2022b). Chapter 11 - The African turquoise killifish (*Nothobranchius*  
564 *furzeri*): biology and research applications. In *Laboratory Fish in Biomedical Research*. L. D'Angelo, and  
565 P. de Girolamo, eds. (Academic Press), pp. 245-287.
- 566 Auer, T.O., Duroure, K., De Cian, A., Concordet, J.P., and Del Bene, F. (2014). Highly efficient  
567 CRISPR/Cas9-mediated knock-in in zebrafish by homology-independent DNA repair. *Genome Res* *24*,  
568 142-153.
- 569 Biran, J., Tahor, M., Wircer, E., and Levkowitz, G. (2015). Role of developmental factors in hypothalamic  
570 function. *Front Neuroanat* *9*, 47.
- 571 Boyden, E.S., Zhang, F., Bamberg, E., Nagel, G., and Deisseroth, K. (2005). Millisecond-timescale,  
572 genetically targeted optical control of neural activity. *Nat Neurosci* *8*, 1263-1268.
- 573 Bradshaw, W.J., Poeschla, M., Placzek, A., Kean, S., and Valenzano, D.R. (2022). Extensive age-  
574 dependent loss of antibody diversity in naturally short-lived turquoise killifish. *Elife* *11*.
- 575 Chen, Y.R., Harel, I., Singh, P.P., Ziv, I., Moses, E., Goshtchevsky, U., Machado, B.E., Brunet, A., and  
576 Jarosz, D.F. (2022). Tissue-specific landscape of protein aggregation and quality control in an aging  
577 vertebrate. *bioRxiv*.
- 578 Chiu, C.N., and Prober, D.A. (2013). Regulation of zebrafish sleep and arousal states: current and  
579 prospective approaches. *Front Neural Circuits* *7*, 58.
- 580 Choi, H.M.T., Schwarzkopf, M., Fornace, M.E., Acharya, A., Artavanis, G., Stegmaier, J., Cunha, A., and  
581 Pierce, N.A. (2018). Third-generation in situ hybridization chain reaction: multiplexed, quantitative,  
582 sensitive, versatile, robust. *Development* *145*.
- 583 Cui, R., Medeiros, T., Willemsen, D., Iasi, L.N.M., Collier, G.E., Graef, M., Reichard, M., and Valenzano,  
584 D.R. (2019). Relaxed Selection Limits Lifespan by Increasing Mutation Load. *Cell* *178*, 385-399 e320.
- 585 D'Angelo, L. (2013). Brain atlas of an emerging teleostean model: *Nothobranchius furzeri*. *Anat Rec*  
586 (Hoboken) *296*, 681-691.
- 587 Dawson, T.M., Golde, T.E., and Lagier-Tourenne, C. (2018). Animal models of neurodegenerative  
588 diseases. *Nat Neurosci* *21*, 1370-1379.
- 589 DiNapoli, S.E., Martinez-McFaline, R., Gribbin, C.K., Wrighton, P.J., Balgobin, C.A., Nelson, I., Leonard,  
590 A., Maskin, C.R., Shwartz, A., Quenzer, E.D., et al. (2020). Synthetic CRISPR/Cas9 reagents facilitate  
591 genome editing and homology directed repair. *Nucleic Acids Res* *48*, e38.
- 592 Dolfi, L., Ripa, R., Antebi, A., Valenzano, D.R., and Cellerino, A. (2019). Cell cycle dynamics during  
593 diapause entry and exit in an annual killifish revealed by FUCCI technology. *Evodevo* *10*, 29.
- 594 Dolfi, L., Ripa, R., and Cellerino, A. (2014). Transition to annual life history coincides with reduction in  
595 cell cycle speed during early cleavage in three independent clades of annual killifish. *Evodevo* *5*, 32.

- 596 Fisher, E.M.C., and Bannerman, D.M. (2019). Mouse models of neurodegeneration: Know your question,  
597 know your mouse. *Sci Transl Med* 11.
- 598 Fronczek, R., van Geest, S., Frolich, M., Overeem, S., Roelandse, F.W., Lammers, G.J., and Swaab,  
599 D.F. (2012). Hypocretin (orexin) loss in Alzheimer's disease. *Neurobiol Aging* 33, 1642-1650.
- 600 Gossen, M., and Bujard, H. (1992). Tight control of gene expression in mammalian cells by tetracycline-  
601 responsive promoters. *Proc Natl Acad Sci U S A* 89, 5547-5551.
- 602 Gossen, M., Freundlieb, S., Bender, G., Muller, G., Hillen, W., and Bujard, H. (1995). Transcriptional  
603 activation by tetracyclines in mammalian cells. *Science* 268, 1766-1769.
- 604 Gutierrez-Triana, J.A., Tavhelidse, T., Thumberger, T., Thomas, I., Wittbrodt, B., Kellner, T., Anlas, K.,  
605 Tsingos, E., and Wittbrodt, J. (2018). Efficient single-copy HDR by 5' modified long dsDNA donors. *Elife*  
606 7.
- 607 Harel, I., Benayoun, B.A., Machado, B., Singh, P.P., Hu, C.K., Pech, M.F., Valenzano, D.R., Zhang, E.,  
608 Sharp, S.C., Artandi, S.E., et al. (2015). A platform for rapid exploration of aging and diseases in a  
609 naturally short-lived vertebrate. *Cell* 160, 1013-1026.
- 610 Harel, I., Chen, Y.R., Ziv, I., Singh, P.P., Negredo, P.N., Goshtchevsky, U., Wang, W., Astre, G., Moses,  
611 E., McKay, A., et al. (2022). Identification of protein aggregates in the aging vertebrate brain with prion-  
612 like and phase separation properties. *bioRxiv*.
- 613 Hartmann, N., and Englert, C. (2012). A microinjection protocol for the generation of transgenic killifish  
614 (Species: *Nothobranchius furzeri*). *Dev Dyn* 241, 1133-1141.
- 615 Hu, C.K., and Brunet, A. (2018). The African turquoise killifish: A research organism to study vertebrate  
616 aging and diapause. *Aging Cell* 17, e12757.
- 617 Hu, C.K., Wang, W., Brind'Amour, J., Singh, P.P., Reeves, G.A., Lorincz, M.C., Alvarado, A.S., and  
618 Brunet, A. (2020). Vertebrate diapause preserves organisms long term through Polycomb complex  
619 members. *Science* 367, 870-874.
- 620 Hunt, N.J., Rodriguez, M.L., Waters, K.A., and Machaalani, R. (2015). Changes in orexin (hypocretin)  
621 neuronal expression with normal aging in the human hypothalamus. *Neurobiol Aging* 36, 292-300.
- 622 Jankowsky, J.L., and Zheng, H. (2017). Practical considerations for choosing a mouse model of  
623 Alzheimer's disease. *Mol Neurodegener* 12, 89.
- 624 Jeong, I., Kim, E., Kim, S., Kim, H.K., Lee, D.W., Seong, J.Y., and Park, H.C. (2018). mRNA expression  
625 and metabolic regulation of *npy* and *agrp1/2* in the zebrafish brain. *Neurosci Lett* 668, 73-79.
- 626 Kanda, T., Sullivan, K.F., and Wahl, G.M. (1998). Histone-GFP fusion protein enables sensitive analysis  
627 of chromosome dynamics in living mammalian cells. *Curr Biol* 8, 377-385.
- 628 Kim, Y., Nam, H.G., and Valenzano, D.R. (2016). The short-lived African turquoise killifish: an emerging  
629 experimental model for ageing. *Dis Model Mech* 9, 115-129.
- 630 Kushawah, G., Hernandez-Huertas, L., Abugattas-Nunez Del Prado, J., Martinez-Morales, J.R., DeVore,  
631 M.L., Hassan, H., Moreno-Sanchez, I., Tomas-Gallardo, L., Diaz-Moscoso, A., Monges, D.E., et al.  
632 (2020). CRISPR-Cas13d Induces Efficient mRNA Knockdown in Animal Embryos. *Dev Cell* 54, 805-817  
633 e807.
- 634 Labun, K., Montague, T.G., Krause, M., Torres Cleuren, Y.N., Tjeldnes, H., and Valen, E. (2019).  
635 CHOPCHOP v3: expanding the CRISPR web toolbox beyond genome editing. *Nucleic Acids Res* 47,  
636 W171-W174.
- 637 Louka, A., Bagnoli, S., Rupert, J., Esapa, B., Tartaglia, G.G., Cellerino, A., Pastore, A., and Terzibasi  
638 Tozzini, E. (2022). New lessons on TDP-43 from old *N. furzeri* killifish. *Aging Cell* 21, e13517.
- 639 Lovett-Barron, M., Andalman, A.S., Allen, W.E., Vesuna, S., Kauvar, I., Burns, V.M., and Deisseroth, K.  
640 (2017). Ancestral Circuits for the Coordinated Modulation of Brain State. *Cell* 171, 1411-1423 e1417.

- 641 Matsui, H., Kenmochi, N., and Namikawa, K. (2019). Age- and alpha-Synuclein-Dependent Degeneration  
642 of Dopamine and Noradrenaline Neurons in the Annual Killifish *Nothobranchius furzeri*. *Cell Rep* 26,  
643 1727-1733 e1726.
- 644 Montesano, A., Baumgart, M., Avallone, L., Castaldo, L., Lucini, C., Tozzini, E.T., Cellerino, A., D'Angelo,  
645 L., and de Girolamo, P. (2019). Age-related central regulation of orexin and NPY in the short-lived African  
646 killifish *Nothobranchius furzeri*. *J Comp Neurol* 527, 1508-1526.
- 647 Nagai, T., Ibata, K., Park, E.S., Kubota, M., Mikoshiba, K., and Miyawaki, A. (2002). A variant of yellow  
648 fluorescent protein with fast and efficient maturation for cell-biological applications. *Nat Biotechnol* 20,  
649 87-90.
- 650 Park, Y.G., Sohn, C.H., Chen, R., McCue, M., Yun, D.H., Drummond, G.T., Ku, T., Evans, N.B., Oak,  
651 H.C., Trieu, W., et al. (2018). Protection of tissue physicochemical properties using polyfunctional  
652 crosslinkers. *Nat Biotechnol*.
- 653 Polacik, M., Blazek, R., and Reichard, M. (2016). Laboratory breeding of the short-lived annual killifish  
654 *Nothobranchius furzeri*. *Nature protocols* 11, 1396-1413.
- 655 Posner, M., Murray, K.L., McDonald, M.S., Eighinger, H., Andrew, B., Drossman, A., Haley, Z.,  
656 Nussbaum, J., David, L.L., and Lampi, K.J. (2017). The zebrafish as a model system for analyzing  
657 mammalian and native alpha-crystallin promoter function. *PeerJ* 5, e4093.
- 658 Prober, D.A., Rihel, J., Onah, A.A., Sung, R.J., and Schier, A.F. (2006). Hypocretin/orexin overexpression  
659 induces an insomnia-like phenotype in zebrafish. *J Neurosci* 26, 13400-13410.
- 660 Reichard, M., Blažek, R., Dyková, I., Žák, J., and Polačik, M. (2022). Chapter 12 - Challenges in keeping  
661 annual killifish. In *Laboratory Fish in Biomedical Research*. L. D'Angelo, and P. de Girolamo, eds.  
662 (Academic Press), pp. 289-310.
- 663 Reichwald, K., Petzold, A., Koch, P., Downie, B.R., Hartmann, N., Pietsch, S., Baumgart, M., Chalopin,  
664 D., Felder, M., Bens, M., et al. (2015). Insights into Sex Chromosome Evolution and Aging from the  
665 Genome of a Short-Lived Fish. *Cell* 163, 1527-1538.
- 666 Sahm, A., Bens, M., Platzer, M., and Cellerino, A. (2017). Parallel evolution of genes controlling  
667 mitonuclear balance in short-lived annual fishes. *Aging Cell* 16, 488-496.
- 668 Schrodell, T., Prevedel, R., Aumayr, K., Zimmer, M., and Vaziri, A. (2013). Brain-wide 3D imaging of  
669 neuronal activity in *Caenorhabditis elegans* with sculpted light. *Nat Methods* 10, 1013-1020.
- 670 Seleit, A., Aulehla, A., and Paix, A. (2021). Endogenous protein tagging in medaka using a simplified  
671 CRISPR/Cas9 knock-in approach. *Elife* 10.
- 672 Singh, C., Rihel, J., and Prober, D.A. (2017). Neuropeptide Y Regulates Sleep by Modulating  
673 Noradrenergic Signaling. *Curr Biol* 27, 3796-3811 e3795.
- 674 Singh, P.P., Reeves, G.A., Contrepolis, K., Ellenberger, M., Hu, C.-K., Snyder, M.P., and Brunet, A.  
675 (2021). Evolution of diapause in the African turquoise killifish by remodeling ancient gene regulatory  
676 landscape. *bioRxiv*.
- 677 Smith, P., Willemsen, D., Popkes, M., Metge, F., Gandiwa, E., Reichard, M., and Valenzano, D.R. (2017).  
678 Regulation of life span by the gut microbiota in the short-lived African turquoise killifish. *Elife* 6.
- 679 Soriano, P. (1999). Generalized lacZ expression with the ROSA26 Cre reporter strain. *Nat Genet* 21, 70-  
680 71.
- 681 Szymczak, A.L., Workman, C.J., Wang, Y., Vignali, K.M., Dilioglou, S., Vanin, E.F., and Vignali, D.A.  
682 (2004). Correction of multi-gene deficiency in vivo using a single 'self-cleaving' 2A peptide-based  
683 retroviral vector. *Nat Biotechnol* 22, 589-594.
- 684 Valenzano, D.R., Benayoun, B.A., Singh, P.P., Zhang, E., Etter, P.D., Hu, C.K., Clement-Ziza, M.,  
685 Willemsen, D., Cui, R., Harel, I., et al. (2015). The African Turquoise Killifish Genome Provides Insights  
686 into Evolution and Genetic Architecture of Lifespan. *Cell* 163, 1539-1554.

- 687 Valenzano, D.R., Sharp, S., and Brunet, A. (2011). Transposon-Mediated Transgenesis in the Short-  
688 Lived African Killifish *Nothobranchius furzeri*, a Vertebrate Model for Aging. *G3 (Bethesda)* *1*, 531-538.
- 689 Van Houcke, J., Marien, V., Zandecki, C., Seuntjens, E., Ayana, R., and Arckens, L. (2021a). Modeling  
690 Neuroregeneration and Neurorepair in an Aging Context: The Power of a Teleost Model. *Front Cell Dev*  
691 *Biol* *9*, 619197.
- 692 Van Houcke, J., Marien, V., Zandecki, C., Vanhunsel, S., Moons, L., Ayana, R., Seuntjens, E., and  
693 Arckens, L. (2021b). Aging impairs the essential contributions of non-gial progenitors to neurorepair in  
694 the dorsal telencephalon of the Killifish *Nothobranchius furzeri*. *Aging Cell* *20*, e13464.
- 695 Vanhunsel, S., Bergmans, S., Beckers, A., Etienne, I., Van Bergen, T., De Groef, L., and Moons, L.  
696 (2022a). The age factor in optic nerve regeneration: Intrinsic and extrinsic barriers hinder successful  
697 recovery in the short-living killifish. *Aging Cell* *21*, e13537.
- 698 Vanhunsel, S., Bergmans, S., Beckers, A., Etienne, I., Van Houcke, J., Seuntjens, E., Arckens, L., De  
699 Groef, L., and Moons, L. (2021). The killifish visual system as an in vivo model to study brain aging and  
700 rejuvenation. *NPJ Aging Mech Dis* *7*, 22.
- 701 Vanhunsel, S., Bergmans, S., and Moons, L. (2022b). Killifish switch towards mammalian-like  
702 regeneration upon aging. *Aging (Albany NY)* *14*, 2924-2925.
- 703 Wang, W., Hu, C.K., Zeng, A., Alegre, D., Hu, D., Gotting, K., Ortega Granillo, A., Wang, Y., Robb, S.,  
704 Schnittker, R., et al. (2020). Changes in regeneration-responsive enhancers shape regenerative  
705 capacities in vertebrates. *Science* *369*.
- 706 Wierson, W.A., Welker, J.M., Almeida, M.P., Mann, C.M., Webster, D.A., Torrie, M.E., Weiss, T.J.,  
707 Kambakam, S., Vollbrecht, M.K., Lan, M., et al. (2020). Efficient targeted integration directed by short  
708 homology in zebrafish and mammalian cells. *Elife* *9*.
- 709 Willemsen, D., Cui, R., Reichard, M., and Valenzano, D.R. (2020). Intra-species differences in population  
710 size shape life history and genome evolution. *Elife* *9*.
- 711 Zak, J., Dykova, I., and Reichard, M. (2020). Good performance of turquoise killifish (*Nothobranchius*  
712 *furzeri*) on pelleted diet as a step towards husbandry standardization. *Sci Rep* *10*, 8986.
- 713
